# Supplementary material for: A Detailed Insight into the Detrital and Diagenetic Mineralogy of Metal(oid)s: Their Origin, Distribution and Associations within Hypersaline Sediments
Source: MDPI journal article supplement (doi:10.3390/min11111168), 2021-10-22
Supplement: s1 [file s1]

**Table S4.** pH and TOC.

| Sample | pH   | TOC (wt.%) |
|--------|------|------------|
| S1     | 7.3  | 0.95       |
| S2     | 7.42 | 1.03       |
| S3     | 7.48 | 1.12       |
| S4     | 7.9  | 0.89       |
| S5     | 7.79 | 0.95       |
| S6     | 7.64 | 1.96       |
| RS1    | 7.35 | 0.91       |
| RS2    | 7.39 | 1.09       |
| RS3    | 7.41 | 1.2        |
| RS4    | 7.88 | 0.85       |
| RS5    | 7.82 | 0.91       |
| RS6    | 7.64 | 1.83       |
