# Supplementary material for: A Detailed Insight into the Detrital and Diagenetic Mineralogy of Metal(oid)s: Their Origin, Distribution and Associations within Hypersaline Sediments
Source: MDPI journal article supplement (doi:10.3390/min11111168), 2021-10-22
Supplement: s1 [file s1]

Table S1. Quality control report.

| Elements                                    | B     | Na    | Mg    | Al    | P     | S     | K     | Ca     | Sc     | Ti    | V     |
|---------------------------------------------|-------|-------|-------|-------|-------|-------|-------|--------|--------|-------|-------|
| Units                                       | mg/kg | %     | %     | %     | mg/kg | %     | %     | %      | mg/kg  | mg/kg | mg/kg |
| 6                                           | <20   | 0.073 | 0.61  | 0.86  | 0.031 | 0.17  | 0.17  | 17.33  | 3.60   | 0.08  | 24    |
| 6R                                          | <20   | 0.075 | 0.59  | 0.88  | 0.029 | 0.18  | 0.18  | 16.10  | 3.90   | 0.08  | 25    |
| Accuracy and repeatability of analytics (%) | -     | -2.74 | 3.28  | -2.33 | 6.45  | -5.88 | -5.88 | 7.10   | -8.33  | 0     | -4.17 |
| Elements                                    | Cr    | Mn    | Fe    | Co    | Ni    | Cu    | Zn    | As     | Sr     | Mo    | Ag    |
| Units                                       | mg/kg  | mg/kg  | mg/kg | ppb   |
| 6                                           | 31.90 | 565   | 1.86  | 10.50 | 63.40 | 35.60 | 89.20 | 6      | 389.10 | 0.65  | 45    |
| 6R                                          | 32.70 | 548   | 1.97  | 9.50  | 63.90 | 36.51 | 87    | 6.70   | 370.90 | 0.69  | 42    |
| Accuracy and repeatability of analytics (%) | -2.51 | 3.01  | -5.91 | 9.52  | 1.96  | -3.88 | -2.63 | -11.67 | 4.68   | -6.15 | 6.67  |
| Elements                                    | Cd    | Sb    | Te    | Ba    | La    | Au    | Hg    | Pb     | Bi     | Th    | U     |
| Units                                       | mg/kg | mg/kg | mg/kg | mg/kg | mg/kg | ppb   | ppb   | mg/kg  | mg/kg  | mg/kg | mg/kg |
| 6                                           | 0.18  | 0.15  | 0.06  | 67.1  | 6.70  | 0.90  | 37    | 27.38  | 0.31   | 2.10  | 0.80  |
| 6R                                          | 0.18  | 0.21  | 0.04  | 70.3  | 7.10  | 0.20  | 35    | 24.57  | 0.31   | 2.30  | 0.70  |
| Accuracy and repeatability of analytics (%) | 0     | -40   | 33.33 | -4.77 | -5.87 | 77.78 | 5.41  | 12.64  | 0      | -9.52 | 12.50 |
