# Supplementary material for: A Detailed Insight into the Detrital and Diagenetic Mineralogy of Metal(oid)s: Their Origin, Distribution and Associations within Hypersaline Sediments
Source: MDPI journal article supplement (doi:10.3390/min11111168), 2021-10-22
Supplement: s1 [file s1]

**Table S2.** EF values all samples.

| EF values                     | Cr   | Ni   | Cu   | Zn   | As   | Cd   | Pb   | Sn   | Hg   | Bi   |
|-------------------------------|------|------|------|------|------|------|------|------|------|------|
| <b>Sediment Samples</b>       |      |      |      |      |      |      |      |      |      |      |
| S1                            | 0.91 | 0.6  | 0.97 | 1.97 | 2    | 0.4  | 0.81 | 0.14 | 1.1  | 1.3  |
| S2                            | 1.1  | 0.48 | 0.92 | 1.6  | 2    | 0.45 | 0.93 | 0.18 | 0.89 | 1.25 |
| S3                            | 0.58 | 0.51 | 1.05 | 1.53 | 1.93 | 0.48 | 0.83 | 0.19 | 0.8  | 1.75 |
| S4                            | 1.37 | 0.65 | 1.49 | 2.6  | 2.75 | 0.55 | 1.72 | 0.64 | 0.9  | 2.5  |
| S5                            | 1.47 | 0.7  | 1.39 | 2.8  | 3    | 0.45 | 1.65 | 0.27 | 0.83 | 2.42 |
| S6                            | 1.3  | 0.67 | 1.59 | 2.7  | 3.3  | 0.43 | 1.86 | 0.29 | 0.93 | 2.6  |
| <b>Rhizo-sediment Samples</b> |      |      |      |      |      |      |      |      |      |      |
| RS1                           | 0.76 | 0.66 | 1.22 | 1.6  | 2.2  | 0.38 | 0.82 | 0.19 | 1.1  | 1.75 |
| RS2                           | 0.97 | 0.52 | 0.88 | 1.34 | 1.76 | 0.5  | 0.7  | 0.2  | 0.79 | 1.42 |
| RS3                           | 0.92 | 0.61 | 1    | 1.45 | 1.86 | 0.45 | 0.72 | 0.17 | 0.88 | 1.3  |
| RS4                           | 1.2  | 0.72 | 1.23 | 2.54 | 2.94 | 0.5  | 1.86 | 0.74 | 1.12 | 2.3  |
| RS5                           | 1.33 | 0.7  | 1.2  | 2.8  | 3.04 | 0.45 | 1.87 | 0.37 | 1.09 | 2.17 |
| RS6                           | 1.35 | 0.79 | 1.35 | 2.5  | 2.75 | 0.48 | 1.83 | 0.47 | 1.17 | 2.3  |
