# Supplementary material for: A Detailed Insight into the Detrital and Diagenetic Mineralogy of Metal(oid)s: Their Origin, Distribution and Associations within Hypersaline Sediments
Source: MDPI journal article supplement (doi:10.3390/min11111168), 2021-10-22
Supplement: s1 [file s1]

**Table S3.** Granulometric parameters.

| Sample     | Mean ( $\mu$ ) | Median ( $\mu$ ) | Sorting ( $\mu$ ) | % clay | % silt | % sand |
|------------|----------------|------------------|-------------------|--------|--------|--------|
| Sample S3  | 21.8           | 10.7             | very poorly       | 17.7   | 53.9   | 28.6   |
| Sample RS3 | 9.3            | 7.1              | very poorly       | 21.9   | 61.1   | 17     |
